# Supplementary material for: Molecular Modes of Action of an Aqueous Nerium oleander Extract in Cancer Cells In Vitro and In Vivo
Source: MDPI journal article supplement (doi:10.3390/molecules28041871), 2023-02-16
Supplement: s1 [file s1]

**Supplementary Table S1.** Pearson correlation test-based COMPARE analysis of proteins directly or inversely correlating with the log<sub>10</sub>IC<sub>50</sub> values for odorside H in 59 tumor cell lines. The protein functions have been extracted from the GeneCards database (<https://www.genecards.org>; accessed on 30 August 2022).

| Symbol   | r-Value | p-Value                 | Entrez Gene ID | Name                                                            | Function                                                                                                                                                                                                                               |
|----------|---------|-------------------------|----------------|-----------------------------------------------------------------|----------------------------------------------------------------------------------------------------------------------------------------------------------------------------------------------------------------------------------------|
| PCMT1    | 0.435   | 2.83 × 10 <sup>-4</sup> | 5110           | Protein-L-isoaspartate (D-aspartate) O-methyltransferase        | Type II class of protein carboxyl methyltransferase enzymes. Protein repair by recognizing and converting D-aspartyl and L-isoaspartyl residues resulting from spontaneous deamidation back to the normal L-aspartyl form              |
| HSP90AA1 | 0.421   | 4.53 × 10 <sup>-4</sup> | 3320           | Heat shock protein 90 α family class A member 1                 | Molecular chaperone                                                                                                                                                                                                                    |
| IGFBP2   | 0.419   | 4.85 × 10 <sup>-4</sup> | 3485           | Insulin-like growth factor-binding protein 2                    | Binds insulin-like growth factors I and II                                                                                                                                                                                             |
| PFKL     | 0.410   | 6.31 × 10 <sup>-4</sup> | 5211           | Phosphofructokinase, liver type                                 | Catalyzes the conversion of D-fructose 6-phosphate to D-fructose 1,6-bisphosphate, which is a key step in glycolysis                                                                                                                   |
| ATP1B3   | 0.404   | 7.51 × 10 <sup>-4</sup> | 483            | ATPase Na <sup>+</sup> /K <sup>+</sup> transporting subunit β 3 | Integral membrane protein maintaining the electrochemical gradients of Na and K ions across the plasma membrane                                                                                                                        |
| MYO1E    | 0.403   | 7.69 × 10 <sup>-4</sup> | 4643           | Myosin IE                                                       | Nonmuscle class I myosin acting as actin-based molecular motors                                                                                                                                                                        |
| CD109    | 0.400   | 8.34 × 10 <sup>-4</sup> | 135228         | 150 KDa TGF-β-1-binding protein                                 | Regulates negatively the signalling by transforming growth factor β                                                                                                                                                                    |
| SNX2     | 0.398   | 8.89 × 10 <sup>-4</sup> | 6643           | Sorting nexin 2                                                 | Protein sorting in the endocytic pathway                                                                                                                                                                                               |
| ETFB     | 0.398   | 9.02 × 10 <sup>-4</sup> | 2109           | Electron transfer flavoprotein subunit β                        | Electron-transfer-flavoprotein involved in mitochondrial fatty acid and amino acid catabolism                                                                                                                                          |
| UFM1     | 0.396   | 9.52 × 10 <sup>-4</sup> | 51569          | Ubiquitin fold modifier 1                                       | Ubiquitylation of target proteins                                                                                                                                                                                                      |
| GSPT2    | 0.391   | 0.001                   | 23708          | G1 to S phase transition 2                                      | GTP-binding elongation factor that mediates translation termination and mRNA stability                                                                                                                                                 |
| ABHD11   | 0.384   | 0.001                   | 83451          | Abhydrolase domain containing 11                                | <i>hydrolase activity, acting on ester bonds</i>                                                                                                                                                                                       |
| RAN      | 0.383   | 0.001                   | 9406           | Ras-related nuclear protein                                     | Small GTP binding protein of the RAS superfamily that is essential for the translocation of RNA and proteins through the nuclear pore complex. The RAN protein is also involved in control of DNA synthesis and cell cycle progression |
| GCDH     | 0.379   | 0.002                   | 2639           | Glutaryl-CoA dehydrogenase                                      | Catalyzes the oxidative decarboxylation of glutaryl-CoA to crotonyl-CoA and CO(2) in the degradative pathway of L-lysine, L-hydroxylysine, and L-tryptophan metabolism                                                                 |
| TUFM     | 0.368   | 0.002                   | 7284           | Tu translation elongation factor, mitochondrial                 | Participates in protein translation in mitochondria                                                                                                                                                                                    |
| ACO2     | 0.368   | 0.002                   | 50             | Aconitase 2                                                     | Catalyzes the interconversion of citrate to isocitrate via cis-aconitate in the second step of the TCA cycle                                                                                                                           |
| KHSRP    | 0.365   | 0.002                   | 8570           | KH-type splicing regulatory protein                             | Multifunctional RNA-binding protein implicated in a variety of cellular processes, including transcription, alternative pre-mRNA splicing, and mRNA localization                                                                       |
| OPA1     | 0.362   | 0.002                   | 4976           | OPA1 mitochondrial dynamin-like GTPase                          | Regulation of mitochondrial stability and energy output. This protein sequesters cytochrome c                                                                                                                                          |
| PKM      | 0.362   | 0.002                   | 5315           | Pyruvate kinase M1/2                                            | Catalyzes the transfer of a phosphoryl group from phosphoenolpyruvate to ADP, generating ATP and pyruvate                                                                                                                              |
| HEXB     | 0.361   | 0.003                   | 3074           | Hexosaminidase subunit β                                        | Catalyzes the degradation of the ganglioside GM2 and other molecules containing terminal N-acetyl hexosamines                                                                                                                          |
| TMOD3    | -0.449  | 1.84 × 10 <sup>-4</sup> | 29766          | Tropomodulin 3                                                  | Cadherin-binding activity involved in cell-cell adhesion; Involved in actin filament organization                                                                                                                                      |
| CCNK     | -0.441  | 2.33 × 10 <sup>-4</sup> | 8812           | Cyclin K                                                        | Regulates transcription through regulating CDK and RNA polymerase II activities                                                                                                                                                        |
| TPM1     | -0.413  | 5.76 × 10 <sup>-4</sup> | 7168           | Tropomyosin α-1 chain                                           | Actin-binding protein                                                                                                                                                                                                                  |

|         |        |                       |        |                                               |                                                                                                                                                                                                                                   |
|---------|--------|-----------------------|--------|-----------------------------------------------|-----------------------------------------------------------------------------------------------------------------------------------------------------------------------------------------------------------------------------------|
| TP53BP1 | -0.406 | $7.07 \times 10^{-4}$ | 7158   | Tumor protein p53-binding protein 1           | DNA double-strand break repair through promoting non-homologous end joining (NHEJ); Promoting checkpoint signaling following DNA damage acting as a scaffold for recruitment of DNA damage response proteins to damaged chromatin |
| PSMA4   | -0.393 | 0.001                 | 5685   | Proteasome 20S subunit $\alpha$ 4             | Degradation of peptides and proteins; Involved in mitotic G1 and G1/S phase transition                                                                                                                                            |
| DBN1    | -0.389 | 0.001                 | 1627   | Drebrin 1                                     | Cytoplasmic actin-binding protein involved in neuronal growth                                                                                                                                                                     |
| FAM213A | -0.385 | 0.001                 | 84293  | Peroxiredoxin-like 2A                         | Antioxidant activity                                                                                                                                                                                                              |
| CALM1   | -0.385 | 0.001                 | 801    | Calmodulin 1                                  | Calcium-binding protein. Calcium-induced activation of calmodulin regulates and modulates the function of cardiac ion channels                                                                                                    |
| BAG5    | -0.378 | 0.002                 | 9529   | BAG cochaperone 5                             | Anti-apoptotic protein that interactions with cell apoptosis and growth related proteins                                                                                                                                          |
| SAP18   | -0.376 | 0.002                 | 10284  | Sin3A-associated protein 18                   | component of the histone deacetylase complex.interacts with SIN3 and enhances SIN3-mediated transcriptional repression                                                                                                            |
| UCHL1   | -0.375 | 0.002                 | 7345   | Ubiquitin C-terminal hydrolase L1             | Thiol protease hydrolyzing peptide bonds at the C-terminal glycine of ubiquitin                                                                                                                                                   |
| HOMER3  | -0.369 | 0.002                 | 9454   | Homer scaffold protein 3                      | Postsynaptic density scaffolding protein that mediates protein-protein interactions                                                                                                                                               |
| RPLP0   | -0.368 | 0.002                 | 6175   | Ribosomal protein lateral stalk subunit P0    | Component of the 60S subunit                                                                                                                                                                                                      |
| HNRNPC  | -0.366 | 0.002                 | 3183   | Heterogeneous nuclear ribonucleoprotein C     | Pre-mRNA processing and other aspects of mRNA metabolism and transport                                                                                                                                                            |
| PDIA3   | -0.362 | 0.002                 | 2923   | Protein disulfide isomerase family A member 3 | protein of the endoplasmic reticulum that interacts with lectin chaperones calreticulin and calnexin to modulate folding of newly synthesized glycoproteins                                                                       |
| RAB35   | -0.359 | 0.003                 | 11021  | RAB35, member RAS oncogene family             | GTPase activity, involved in endosomal transport                                                                                                                                                                                  |
| PRPF38B | -0.356 | 0.003                 | 55119  | Pre-mRNA processing factor 38B                | Involved in mRNA splicing via spliceosome                                                                                                                                                                                         |
| YTHDF3  | -0.356 | 0.003                 | 253943 | YTH N6-methyladenosine RNA-binding protein 3  | RNA-binding                                                                                                                                                                                                                       |
| ITGA5   | -0.354 | 0.003                 | 3678   | Integrin subunit $\alpha$ 5                   | Cell surface adhesion and signaling, may promote tumor invasion                                                                                                                                                                   |
| ERH     | -0.351 | 0.003                 | 2079   | ERH mRNA splicing and mitosis actor           | Methyl-CpG binding activity; involved in pyrimidine nucleoside metabolic processes                                                                                                                                                |

**Supplementary Table S2.** Pearson correlation test-based COMPARE analysis of proteins directly or inversely correlating with the log<sub>10</sub>IC<sub>50</sub> values for neritaloside H in 59 tumor cell lines. The protein functions have been extracted from the GeneCards database (<https://www.genecards.org/>; accessed on 30 August 2022).

| Symbol   | r-Value | p-Value                 | Entrez Gene ID | Name                                                    | Function                                                                                                                                                                                                          |
|----------|---------|-------------------------|----------------|---------------------------------------------------------|-------------------------------------------------------------------------------------------------------------------------------------------------------------------------------------------------------------------|
| FAM134C  | 0.409   | 6.57 × 10 <sup>-4</sup> | 162427         | Reticulophagy regulator family member 3                 | Involved in positive regulation of neuron projection development                                                                                                                                                  |
| HSP90AA1 | 0.397   | 9.39 × 10 <sup>-4</sup> | 3320           | Heat shock protein 90 α family class A member 1         | Chaperone function                                                                                                                                                                                                |
| MCCC1    | 0.395   | 9.93 × 10 <sup>-4</sup> | 56922          | Methylcrotonyl-CoA carboxylase subunit 1                | Catalyzes the carboxylation of 3-methylcrotonyl-CoA to form 3-methylglutaconyl-CoA                                                                                                                                |
| HEXB     | 0.394   | 9.95 × 10 <sup>-4</sup> | 3074           | Hexosaminidase subunit β                                | Catalyzes the degradation of ganglioside GM2 and other molecules containing terminal N-acetyl hexosamines                                                                                                         |
| PKM      | 0.388   | 0.001                   | 5315           | Pyruvate kinase M1/2                                    | Catalyzes the transfer of a phosphoryl group from phosphoenolpyruvate to ADP, generating ATP and pyruvate                                                                                                         |
| RTRAF    | 0.373   | 0.002                   | 51637          | RNA transcription, translation and transport factor     | Involved in negative regulation of protein kinase activity. Regulation of transcription by RNA polymerase II and tRNA splicing                                                                                    |
| SNX2     | 0.358   | 0.003                   | 6643           | Sorting nexin 2                                         | Protein sorting in the endocytic pathway                                                                                                                                                                          |
| SEC62    | 0.352   | 0.003                   | 7095           | SEC62 homolog, preprotein translocation factor          | Component of the protein translocation apparatus of the endoplasmic reticulum membrane. Post-translational protein translocation into the ER                                                                      |
| PIGK     | 0.350   | 0.003                   | 10026          | Phosphatidylinositol glycan anchor biosynthesis class K | Glycosylphosphatidylinositol (GPI)-anchor biosynthesis                                                                                                                                                            |
| PFKM     | 0.350   | 0.003                   | 5213           | Phosphofructokinase, muscle                             | Catalyzes the phosphorylation of fructose-6-phosphate to fructose-1,6-bisphosphate                                                                                                                                |
| RAN      | 0.331   | 0.005                   | 5901           | Ras-related nuclear protein                             | Small GTP-binding protein belonging to the RAS superfamily. Essential for the translocation of RNA and proteins through the nuclear pore complex. Involved in control of DNA synthesis and cell cycle progression |
| LGALS3BP | 0.331   | 0.005                   | 3959           | Galectin 3-binding protein                              | β-galactoside-binding protein implicated in modulating cell-cell and cell-matrix interactions                                                                                                                     |
| CIP2A    | 0.330   | 0.005                   | 57650          | Cancerous inhibitor of PP2A                             | Regulation of neural precursor cell proliferation and spermatogenesis                                                                                                                                             |
| MFI2     | 0.330   | 0.005                   | 4241           | Melanotransferrin                                       | Iron-binding properties                                                                                                                                                                                           |
| CD109    | 0.327   | 0.006                   | 135228         | 150 KDa TGF-β-1-binding protein                         | Negative regulation of transforming growth factor β signaling                                                                                                                                                     |
| AP2A1    | 0.327   | 0.006                   | 160            | Adaptor-related protein complex 2 subunit α 1           | Subunit of the adaptor protein 2 (AP-2) complex found in clathrin coated vesicles                                                                                                                                 |
| IGFBP2   | 0.326   | 0.005                   | 3485           | Insulin-like growth factor binding protein 2            | Binds insulin-like growth factors I and II                                                                                                                                                                        |
| SYNM     | 0.323   | 0.006                   | 23336          | Synemin                                                 | Cytoskeletal protein that confers resistance to mechanical stress                                                                                                                                                 |
| UQCRB    | 0.320   | 0.007                   | 7381           | Ubiquinol cytochrome C reductase-binding protein        | Electron transfer upon ubiquinone binding. Role in hypoxia-induced angiogenesis through mitochondrial reactive oxygen species-mediated signaling                                                                  |
| OPA1     | 0.317   | 0.007                   | 4976           | OPA1 mitochondrial dynamin-like GTPase                  | Regulation of mitochondrial stability and energy output                                                                                                                                                           |
| ATP11A   | -0.463  | 1.12 × 10 <sup>-4</sup> | 23250          | ATPase phospholipid transporting 11A                    | Transport of calcium ions across membranes                                                                                                                                                                        |
| DFFA     | -0.461  | 1.21 × 10 <sup>-4</sup> | 1676           | DNA fragmentation factor, 45kDa, α polypeptide          | DFFA is a substrate for caspase-3 and triggers DNA fragmentation during apoptosis                                                                                                                                 |
| PSMA6    | -0.436  | 2.82 × 10 <sup>-4</sup> | 5687           | Proteasome 20S subunit α 6                              | Degradation of peptides and proteins                                                                                                                                                                              |
| LDHB     | -0.431  | 3.25 × 10 <sup>-4</sup> | 3945           | Lactate dehydrogenase B                                 | Catalyzes the interconversion of pyruvate and lactate with concomitant interconversion of NADH and NAD <sup>+</sup> in a post-glycolysis process                                                                  |
| FAM213A  | -0.430  | 3.38 × 10 <sup>-4</sup> | 84293          | Peroxiredoxin-like 2A                                   | Antioxidant activity. Regulation of osteoclast differentiation                                                                                                                                                    |
| RPLP0    | -0.429  | 3.55 × 10 <sup>-4</sup> | 6175           | Ribosomal protein lateral stalk subunit P0              | Component of the 60S subunit                                                                                                                                                                                      |
| RBM26    | -0.427  | 3.72 × 10 <sup>-4</sup> | 64062          | RNA-binding motif protein 26                            | involved in mRNA processing                                                                                                                                                                                       |

|        |        |                       |        |                                                                |                                                                                                                                |
|--------|--------|-----------------------|--------|----------------------------------------------------------------|--------------------------------------------------------------------------------------------------------------------------------|
| PSMA4  | -0.420 | $4.71 \times 10^{-4}$ | 5685   | Proteasome 20S subunit $\alpha$ 4                              | Degradation of peptides and proteins. Involved in mitotic G1 and G1/S phase transition                                         |
| TIA1   | -0.419 | $4.74 \times 10^{-4}$ | 7072   | Subunit of mitochondrial ATP synthase                          |                                                                                                                                |
| APEX1  | -0.415 | $5.40 \times 10^{-4}$ | 328    | Apurinic/apyrimidinic endodeoxyribonuclease 1                  | DNA repair enzyme with apurinic/apyrimidinic (AP) activity                                                                     |
| ATP5F1 | -0.410 | $6.34 \times 10^{-4}$ | 515    | ATP synthase peripheral stalk-membrane subunit B               |                                                                                                                                |
| HNRNPC | -0.409 | $6.48 \times 10^{-4}$ | 3183   | Heterogeneous nuclear ribonucleoprotein C                      | Involved in pre-mRNA processing                                                                                                |
| CALM1  | -0.406 | $7.01 \times 10^{-4}$ | 801    | Calmodulin 1                                                   | Calcium-binding protein. Calcium-induced activation of calmodulin regulates and modulates the function of cardiac ion channels |
| AHSA1  | -0.405 | $7.26 \times 10^{-4}$ | 10598  | Activator of HSP90 ATPase activity 1                           | Hsp90 protein binding activity. Involved in regulation of ATPase activity                                                      |
| IPO5   | -0.402 | $8.09 \times 10^{-4}$ | 3843   | Importin 5                                                     | Nucleocytoplasmic transport                                                                                                    |
| CBX5   | -0.401 | $8.21 \times 10^{-4}$ | 23468  | Chromobox homolog 5 (HP1 $\alpha$ homolog, <i>Drosophila</i> ) | Involved in the formation of functional kinetochore through interaction with essential kinetochore proteins                    |
| PFAS   | -0.399 | $8.73 \times 10^{-4}$ | 5198   | Phosphoribosylformylglycinamide synthase                       | <i>De novo</i> pathway of purine biosynthesis                                                                                  |
| ERH    | -0.393 | 0.001                 | 2079   | ERH mRNA splicing and mitosis factor                           | Methyl-CpG binding activity. Involved in pyrimidine nucleoside metabolic processes                                             |
| RPS13  | -0.386 | 0.001                 | 6207   | Ribosomal protein S13                                          | Functions at early steps in ribosome assembly                                                                                  |
| ZNF428 | -0.384 | 0.001                 | 126299 | Zinc finger protein 428                                        | Metal ion-binding activity                                                                                                     |
